# Supplementary material
Source: PubMed Central journal article supplement (PMC3424760)

Supplemental Figure 1. AN-evoked synaptic currents in VCN are not influenced by activation of voltage-gated sodium channels

*A*, Representative example of a P0 stimulus-evoked current in the presence of 5 mM QX-314 demonstrates evidence for multiple, asynchronous synaptic events (arrowheads), similar to control data (Fig. 3A). Arrow denotes AN stimulus onset. *B*, Depolarizing voltage steps (total range -80 mV to 40 mV from  $V_{\text{hold}}$  of -70 mV) for the same neuron presented in *A* demonstrates blockade of  $\text{Na}^+$  current by QX-314 (asterisk indicates absence of inward current). Capacitive transient truncated at stimulus onset.

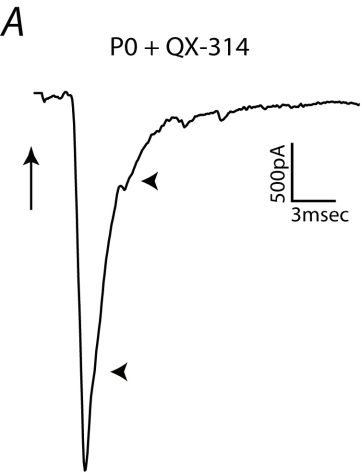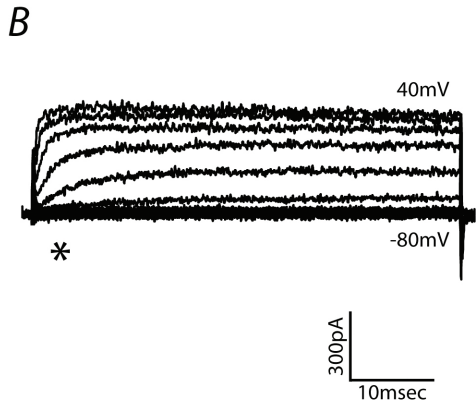

Supplement: tjp0590-2391-SD1.pdf [file tjp0590-2391-SD1.pdf]
